# Supplementary material for: Structural inequalities emerging from a large wire transfers network
Source: Springer Nature journal article supplement (doi:10.1007/s41109-020-00314-x), 2020-10-13
Supplement: 41109_2020_314_MOESM4_ESM.pdf [file 41109_2020_314_MOESM4_ESM.pdf]

## Additional Materials D: Bow-tie main components

This appendix contains in tabular forms all the values used to produce plots and diagrams shown in Section “Inter- and intra-components flows” in the paper.

|        |                | RECEIVER       |              |         |            | TOTAL  |
|--------|----------------|----------------|--------------|---------|------------|--------|
|        |                | Natural Person | Legal Person | No Info | Mislabeled |        |
| SENDER | Natural Person | 41,8%          | 9,2%         | 3,5%    | 0,2%       | 54,8%  |
|        | Legal Person   | 20,1%          | 8,8%         | 1,7%    | 0,2%       | 30,8%  |
|        | No Info        | 6,4%           | 1,5%         | 4,2%    | 0,0%       | 12,2%  |
|        | Mislabeled     | 1,2%           | 0,8%         | 0,2%    | 0,0%       | 2,2%   |
|        | TOTAL          | 69,4%          | 20,3%        | 9,7%    | 0,6%       | 100,0% |

(a) Number

|        |                | RECEIVER       |              |         |            | TOTAL  |
|--------|----------------|----------------|--------------|---------|------------|--------|
|        |                | Natural Person | Legal Person | No Info | Mislabeled |        |
| SENDER | Natural Person | 22,0%          | 4,9%         | 1,7%    | 0,2%       | 28,7%  |
|        | Legal Person   | 10,1%          | 33,5%        | 4,2%    | 0,6%       | 48,4%  |
|        | No Info        | 5,5%           | 4,7%         | 11,1%   | 0,1%       | 21,4%  |
|        | Mislabeled     | 0,7%           | 0,4%         | 0,1%    | 0,2%       | 1,4%   |
|        | TOTAL          | 38,4%          | 43,6%        | 17,0%   | 1,0%       | 100,0% |

(b) Amount

Figure D1: **IN**: distribution of wire transfers, by sender/receiver type

|        |                | RECEIVER       |              |         |            | TOTAL  |
|--------|----------------|----------------|--------------|---------|------------|--------|
|        |                | Natural Person | Legal Person | No Info | Mislabeled |        |
| SENDER | Natural Person | 6,0%           | 8,7%         | 2,8%    | 0,2%       | 17,6%  |
|        | Legal Person   | 25,7%          | 28,2%        | 8,1%    | 0,7%       | 62,7%  |
|        | No Info        | 5,8%           | 8,2%         | 4,3%    | 0,2%       | 18,6%  |
|        | Mislabeled     | 0,4%           | 0,5%         | 0,2%    | 0,0%       | 1,1%   |
|        | TOTAL          | 38,0%          | 45,5%        | 15,4%   | 1,1%       | 100,0% |

(a) Number

|        |                | RECEIVER       |              |         |            | TOTAL  |
|--------|----------------|----------------|--------------|---------|------------|--------|
|        |                | Natural Person | Legal Person | No Info | Mislabeled |        |
| SENDER | Natural Person | 0,9%           | 1,0%         | 0,3%    | 0,1%       | 2,1%   |
|        | Legal Person   | 5,2%           | 47,4%        | 18,4%   | 0,8%       | 71,8%  |
|        | No Info        | 1,0%           | 11,0%        | 12,1%   | 0,6%       | 24,6%  |
|        | Mislabeled     | 0,1%           | 0,6%         | 0,7%    | 0,1%       | 1,5%   |
|        | TOTAL          | 7,1%           | 59,9%        | 31,4%   | 1,5%       | 100,0% |

(b) Amount

Figure D2: **SCC**: distribution of wire transfers, by sender/receiver type

|        |                | RECEIVER       |              |         |            |        |
|--------|----------------|----------------|--------------|---------|------------|--------|
|        |                | Natural Person | Legal Person | No Info | Mislabeled | TOTAL  |
| SENDER | Natural Person | 56,1%          | 8,2%         | 5,8%    | 0,3%       | 70,5%  |
|        | Legal Person   | 11,9%          | 4,2%         | 1,2%    | 0,2%       | 17,5%  |
|        | No Info        | 4,8%           | 1,7%         | 4,9%    | 0,1%       | 11,6%  |
|        | Mislabeled     | 0,3%           | 0,1%         | 0,0%    | 0,0%       | 0,4%   |
|        | TOTAL          | 73,1%          | 14,3%        | 12,0%   | 0,6%       | 100,0% |

(a) Number

|        |                | RECEIVER       |              |         |            |        |
|--------|----------------|----------------|--------------|---------|------------|--------|
|        |                | Natural Person | Legal Person | No Info | Mislabeled | TOTAL  |
| SENDER | Natural Person | 13,1%          | 2,0%         | 2,0%    | 0,1%       | 17,3%  |
|        | Legal Person   | 2,9%           | 34,0%        | 4,8%    | 0,4%       | 42,0%  |
|        | No Info        | 1,6%           | 7,6%         | 31,0%   | 0,0%       | 40,3%  |
|        | Mislabeled     | 0,1%           | 0,1%         | 0,2%    | 0,1%       | 0,4%   |
|        | TOTAL          | 17,7%          | 43,6%        | 38,0%   | 0,6%       | 100,0% |

(b) Amount

Figure D3: **OUT**: distribution of wire transfers, by sender/receiver type

| SENDER                     | RECEIVER |           |         |         |                            |          |        |                 |                  |                       |                       |             |                    | TOTAL |                |                     |         |
|----------------------------|----------|-----------|---------|---------|----------------------------|----------|--------|-----------------|------------------|-----------------------|-----------------------|-------------|--------------------|-------|----------------|---------------------|---------|
|                            | COMMERCE | EDUCATION | FARMING | FINANCE | HEALTH AND SOCIAL SERVICES | INDUSTRY | MINING | NATURAL PERSONS | OTHER ACTIVITIES | PROFESSIONAL SERVICES | PUBLIC ADMINISTRATION | REAL ESTATE | SERVICES PROVIDERS |       | TRANSPORTATION | TRAVELS AND TOURISM | UNKNOWN |
| COMMERCE                   | 1.4%     | 0.0%      | 0.1%    | 0.0%    | 0.0%                       | 0.2%     | 0.0%   | 3.7%            | 0.0%             | 0.1%                  | 0.0%                  | 0.2%        | 0.0%               | 0.0%  | 0.1%           | 0.4%                | 6.2%    |
| EDUCATION                  | 0.0%     | 0.0%      | 0.0%    | 0.0%    | 0.0%                       | 0.0%     | 0.0%   | 0.2%            | 0.0%             | 0.0%                  | 0.0%                  | 0.0%        | 0.0%               | 0.0%  | 0.0%           | 0.0%                | 0.3%    |
| FARMING                    | 0.0%     | 0.0%      | 0.2%    | 0.0%    | 0.0%                       | 0.0%     | 0.0%   | 0.4%            | 0.0%             | 0.0%                  | 0.0%                  | 0.0%        | 0.0%               | 0.0%  | 0.0%           | 0.1%                | 0.7%    |
| FINANCE                    | 0.0%     | 0.0%      | 0.2%    | 0.0%    | 0.0%                       | 0.0%     | 0.0%   | 0.9%            | 0.0%             | 0.0%                  | 0.0%                  | 0.0%        | 0.0%               | 0.0%  | 0.0%           | 0.2%                | 1.3%    |
| HEALTH AND SOCIAL SERVICES | 0.0%     | 0.0%      | 0.0%    | 0.1%    | 0.0%                       | 0.0%     | 0.0%   | 1.3%            | 0.0%             | 0.0%                  | 0.0%                  | 0.0%        | 0.0%               | 0.0%  | 0.0%           | 0.2%                | 1.7%    |
| INDUSTRY                   | 0.1%     | 0.0%      | 0.0%    | 0.0%    | 0.3%                       | 0.0%     | 0.0%   | 2.3%            | 0.0%             | 0.1%                  | 0.0%                  | 0.1%        | 0.0%               | 0.0%  | 0.0%           | 0.2%                | 3.4%    |
| MINING                     | 0.0%     | 0.0%      | 0.0%    | 0.0%    | 0.0%                       | 0.0%     | 0.0%   | 0.0%            | 0.0%             | 0.0%                  | 0.0%                  | 0.0%        | 0.0%               | 0.0%  | 0.0%           | 0.0%                | 0.0%    |
| NATURAL PERSONS            | 1.2%     | 0.0%      | 0.1%    | 0.4%    | 0.7%                       | 0.4%     | 0.0%   | 41.8%           | 0.0%             | 1.2%                  | 0.0%                  | 1.3%        | 0.0%               | 0.1%  | 0.5%           | 6.8%                | 54.8%   |
| OTHER ACTIVITIES           | 0.0%     | 0.0%      | 0.0%    | 0.0%    | 0.0%                       | 0.0%     | 0.0%   | 0.3%            | 0.1%             | 0.0%                  | 0.0%                  | 0.0%        | 0.0%               | 0.0%  | 0.0%           | 0.1%                | 0.6%    |
| PROFESSIONAL SERVICES      | 0.1%     | 0.0%      | 0.0%    | 0.0%    | 0.0%                       | 0.0%     | 0.0%   | 2.8%            | 0.0%             | 0.6%                  | 0.0%                  | 0.1%        | 0.0%               | 0.0%  | 0.0%           | 0.4%                | 4.1%    |
| PUBLIC ADMINISTRATION      | 0.0%     | 0.0%      | 0.0%    | 0.0%    | 0.0%                       | 0.0%     | 0.0%   | 0.0%            | 0.0%             | 0.0%                  | 0.0%                  | 0.0%        | 0.0%               | 0.0%  | 0.0%           | 0.0%                | 0.0%    |
| REAL ESTATE                | 0.0%     | 0.0%      | 0.0%    | 0.0%    | 0.0%                       | 0.0%     | 0.0%   | 1.6%            | 0.0%             | 0.1%                  | 0.5%                  | 0.0%        | 0.0%               | 0.0%  | 0.0%           | 0.2%                | 2.6%    |
| SERVICES PROVIDERS         | 0.0%     | 0.0%      | 0.0%    | 0.0%    | 0.0%                       | 0.0%     | 0.0%   | 0.1%            | 0.0%             | 0.0%                  | 0.0%                  | 0.0%        | 0.0%               | 0.0%  | 0.0%           | 0.0%                | 0.1%    |
| TRANSPORTATION             | 0.1%     | 0.0%      | 0.0%    | 0.0%    | 0.0%                       | 0.0%     | 0.0%   | 0.0%            | 0.0%             | 0.0%                  | 0.0%                  | 0.0%        | 0.0%               | 0.0%  | 0.0%           | 0.0%                | 0.1%    |
| TRAVELS AND TOURISM        | 0.5%     | 0.0%      | 0.1%    | 0.1%    | 0.2%                       | 0.2%     | 0.0%   | 1.9%            | 0.1%             | 0.7%                  | 0.4%                  | 0.1%        | 0.0%               | 0.0%  | 0.0%           | 0.0%                | 2.9%    |
| UNKNOWN                    | 0.5%     | 0.0%      | 0.1%    | 0.1%    | 0.2%                       | 0.2%     | 0.0%   | 11.6%           | 0.1%             | 0.4%                  | 0.0%                  | 0.4%        | 0.0%               | 0.0%  | 0.2%           | 6.2%                | 20.2%   |
| TOTAL                      | 3.5%     | 0.2%      | 0.7%    | 0.8%    | 1.5%                       | 1.3%     | 0.0%   | 69.4%           | 0.4%             | 2.7%                  | 0.0%                  | 2.7%        | 0.1%               | 0.3%  | 1.2%           | 15.1%               | 100.0%  |

Figure D4: IN - IN: distribution of wire transfers, by sender's and receiver's NACE (total number).

| SENDER                     | RECEIVER |           |         |         |                            |          |        |                 |                  |                       |                       |             |                    | TOTAL |                |                     |         |
|----------------------------|----------|-----------|---------|---------|----------------------------|----------|--------|-----------------|------------------|-----------------------|-----------------------|-------------|--------------------|-------|----------------|---------------------|---------|
|                            | COMMERCE | EDUCATION | FARMING | FINANCE | HEALTH AND SOCIAL SERVICES | INDUSTRY | MINING | NATURAL PERSONS | OTHER ACTIVITIES | PROFESSIONAL SERVICES | PUBLIC ADMINISTRATION | REAL ESTATE | SERVICES PROVIDERS |       | TRANSPORTATION | TRAVELS AND TOURISM | UNKNOWN |
| COMMERCE                   | 2.7%     | 0.0%      | 0.1%    | 0.0%    | 0.0%                       | 0.2%     | 0.0%   | 1.2%            | 0.0%             | 0.1%                  | 0.0%                  | 0.2%        | 0.0%               | 0.0%  | 0.0%           | 0.8%                | 5.5%    |
| EDUCATION                  | 0.0%     | 0.1%      | 0.0%    | 0.0%    | 0.0%                       | 0.0%     | 0.0%   | 0.0%            | 0.0%             | 0.0%                  | 0.0%                  | 0.0%        | 0.0%               | 0.0%  | 0.0%           | 0.0%                | 0.3%    |
| FARMING                    | 0.0%     | 0.0%      | 0.3%    | 0.0%    | 0.0%                       | 0.0%     | 0.0%   | 0.3%            | 0.0%             | 0.0%                  | 0.0%                  | 0.0%        | 0.0%               | 0.0%  | 0.0%           | 0.1%                | 0.9%    |
| FINANCE                    | 0.1%     | 0.0%      | 0.1%    | 2.2%    | 0.0%                       | 0.2%     | 0.0%   | 1.8%            | 0.0%             | 0.1%                  | 0.0%                  | 0.1%        | 0.0%               | 0.0%  | 0.0%           | 0.3%                | 4.8%    |
| HEALTH AND SOCIAL SERVICES | 0.0%     | 0.0%      | 0.0%    | 0.0%    | 0.4%                       | 0.0%     | 0.0%   | 0.4%            | 0.0%             | 0.0%                  | 0.0%                  | 0.0%        | 0.0%               | 0.0%  | 0.0%           | 0.2%                | 1.1%    |
| INDUSTRY                   | 0.1%     | 0.0%      | 0.0%    | 0.0%    | 0.0%                       | 3.0%     | 0.0%   | 1.0%            | 0.0%             | 0.1%                  | 0.0%                  | 0.2%        | 0.0%               | 0.0%  | 0.0%           | 0.6%                | 5.3%    |
| MINING                     | 0.0%     | 0.0%      | 0.0%    | 0.0%    | 0.0%                       | 0.0%     | 0.0%   | 0.0%            | 0.0%             | 0.0%                  | 0.0%                  | 0.0%        | 0.0%               | 0.0%  | 0.0%           | 0.0%                | 0.0%    |
| NATURAL PERSONS            | 0.6%     | 0.1%      | 0.3%    | 0.5%    | 0.2%                       | 0.5%     | 0.0%   | 22.0%           | 0.1%             | 0.6%                  | 0.0%                  | 1.3%        | 0.0%               | 0.0%  | 0.4%           | 2.3%                | 28.7%   |
| OTHER ACTIVITIES           | 0.0%     | 0.0%      | 0.0%    | 0.0%    | 0.0%                       | 0.0%     | 0.0%   | 0.1%            | 0.1%             | 0.0%                  | 0.0%                  | 0.0%        | 0.0%               | 0.0%  | 0.0%           | 0.0%                | 0.3%    |
| PROFESSIONAL SERVICES      | 0.2%     | 0.0%      | 0.0%    | 0.0%    | 0.0%                       | 0.0%     | 0.0%   | 1.7%            | 6.2%             | 0.0%                  | 0.0%                  | 0.2%        | 0.0%               | 0.0%  | 0.0%           | 1.2%                | 9.7%    |
| PUBLIC ADMINISTRATION      | 0.0%     | 0.0%      | 0.0%    | 0.0%    | 0.0%                       | 0.0%     | 0.0%   | 0.0%            | 0.0%             | 0.0%                  | 0.0%                  | 0.0%        | 0.0%               | 0.0%  | 0.0%           | 0.0%                | 0.0%    |
| REAL ESTATE                | 0.0%     | 0.0%      | 0.0%    | 0.0%    | 0.0%                       | 0.1%     | 0.0%   | 1.2%            | 0.0%             | 1.7%                  | 0.0%                  | 1.3%        | 0.0%               | 0.0%  | 0.0%           | 0.8%                | 5.4%    |
| SERVICES PROVIDERS         | 0.0%     | 0.0%      | 0.0%    | 0.0%    | 0.0%                       | 0.0%     | 0.0%   | 0.0%            | 0.0%             | 0.0%                  | 0.0%                  | 0.0%        | 0.2%               | 0.0%  | 0.0%           | 0.0%                | 0.3%    |
| TRANSPORTATION             | 0.1%     | 0.0%      | 0.0%    | 0.0%    | 0.0%                       | 0.0%     | 0.0%   | 0.0%            | 0.0%             | 0.0%                  | 0.0%                  | 0.0%        | 0.0%               | 0.0%  | 0.0%           | 0.0%                | 0.4%    |
| TRAVELS AND TOURISM        | 0.6%     | 0.0%      | 0.2%    | 1.0%    | 0.2%                       | 3.2%     | 0.0%   | 7.7%            | 2.6%             | 0.6%                  | 0.0%                  | 0.1%        | 0.1%               | 0.0%  | 0.2%           | 0.9%                | 17.4%   |
| UNKNOWN                    | 4.4%     | 0.3%      | 1.0%    | 3.9%    | 0.9%                       | 7.3%     | 0.0%   | 36.4%           | 0.4%             | 11.5%                 | 0.0%                  | 4.4%        | 0.5%               | 2.5%  | 1.1%           | 16.5%               | 85.8%   |
| TOTAL                      | 4.4%     | 0.3%      | 1.0%    | 3.9%    | 0.9%                       | 7.3%     | 0.0%   | 36.4%           | 0.4%             | 11.5%                 | 0.0%                  | 4.4%        | 0.5%               | 2.5%  | 1.1%           | 16.5%               | 85.8%   |
|                            |          |           |         |         |                            |          |        |                 |                  |                       |                       |             |                    |       |                |                     | 100.0%  |

Figure D5: IN - IN: distribution of wire transfers, by sender's and receiver's NACE (total amount).

| SENDER                     | RECEIVER |           |         |         |                            |          |        |                 |                  |                       |                       |             |                    | TOTAL |                |                     |         |
|----------------------------|----------|-----------|---------|---------|----------------------------|----------|--------|-----------------|------------------|-----------------------|-----------------------|-------------|--------------------|-------|----------------|---------------------|---------|
|                            | COMMERCE | EDUCATION | FARMING | FINANCE | HEALTH AND SOCIAL SERVICES | INDUSTRY | MINING | NATURAL PERSONS | OTHER ACTIVITIES | PROFESSIONAL SERVICES | PUBLIC ADMINISTRATION | REAL ESTATE | SERVICES PROVIDERS |       | TRANSPORTATION | TRAVELS AND TOURISM | UNKNOWN |
| COMMERCE                   | 1.7%     | 0.0%      | 0.1%    | 0.1%    | 0.0%                       | 0.9%     | 0.0%   | 2.5%            | 0.0%             | 0.5%                  | 0.0%                  | 0.2%        | 0.1%               | 0.3%  | 0.3%           | 1.8%                | 8.5%    |
| EDUCATION                  | 0.0%     | 0.0%      | 0.0%    | 0.0%    | 0.0%                       | 0.0%     | 0.0%   | 0.2%            | 0.0%             | 0.0%                  | 0.0%                  | 0.0%        | 0.0%               | 0.0%  | 0.0%           | 0.1%                | 0.5%    |
| FARMING                    | 0.1%     | 0.0%      | 0.1%    | 0.0%    | 0.0%                       | 0.1%     | 0.0%   | 0.1%            | 0.0%             | 0.0%                  | 0.0%                  | 0.0%        | 0.0%               | 0.0%  | 0.0%           | 0.2%                | 0.7%    |
| FINANCE                    | 0.1%     | 0.0%      | 0.0%    | 0.6%    | 0.0%                       | 0.0%     | 0.0%   | 3.5%            | 0.0%             | 0.0%                  | 0.0%                  | 0.0%        | 0.0%               | 0.0%  | 0.0%           | 0.5%                | 5.0%    |
| HEALTH AND SOCIAL SERVICES | 0.2%     | 0.0%      | 0.0%    | 0.0%    | 0.1%                       | 0.1%     | 0.0%   | 1.0%            | 0.0%             | 0.1%                  | 0.0%                  | 0.0%        | 0.0%               | 0.0%  | 0.4%           | 0.4%                | 2.1%    |
| INDUSTRY                   | 0.9%     | 0.0%      | 0.0%    | 0.1%    | 0.0%                       | 1.1%     | 0.0%   | 2.9%            | 0.0%             | 0.4%                  | 0.0%                  | 0.2%        | 0.2%               | 0.3%  | 1.7%           | 1.7%                | 8.1%    |
| MINING                     | 0.8%     | 0.0%      | 0.0%    | 0.0%    | 0.0%                       | 0.0%     | 0.0%   | 0.2%            | 0.0%             | 0.0%                  | 0.0%                  | 0.0%        | 0.0%               | 0.0%  | 0.1%           | 0.1%                | 1.1%    |
| NATURAL PERSONS            | 0.9%     | 0.3%      | 0.1%    | 0.5%    | 0.4%                       | 0.3%     | 0.0%   | 6.0%            | 0.1%             | 1.0%                  | 0.0%                  | 0.7%        | 0.3%               | 0.1%  | 0.8%           | 6.3%                | 17.6%   |
| OTHER ACTIVITIES           | 0.1%     | 0.0%      | 0.0%    | 0.0%    | 0.0%                       | 0.0%     | 0.0%   | 0.2%            | 0.1%             | 0.0%                  | 0.0%                  | 0.0%        | 0.0%               | 0.0%  | 0.1%           | 0.1%                | 0.7%    |
| PROFESSIONAL SERVICES      | 0.8%     | 0.0%      | 0.0%    | 0.1%    | 0.0%                       | 0.2%     | 0.0%   | 2.8%            | 0.1%             | 0.9%                  | 0.0%                  | 0.2%        | 0.1%               | 0.1%  | 0.4%           | 1.4%                | 7.2%    |
| PUBLIC ADMINISTRATION      | 0.0%     | 0.0%      | 0.0%    | 0.0%    | 0.0%                       | 0.0%     | 0.0%   | 0.0%            | 0.0%             | 0.0%                  | 0.0%                  | 0.0%        | 0.0%               | 0.0%  | 0.0%           | 0.0%                | 0.0%    |
| REAL ESTATE                | 0.4%     | 0.0%      | 0.0%    | 0.0%    | 0.0%                       | 0.2%     | 0.0%   | 1.0%            | 0.0%             | 0.3%                  | 0.0%                  | 0.5%        | 0.1%               | 0.0%  | 0.1%           | 0.9%                | 3.5%    |
| SERVICES PROVIDERS         | 0.1%     | 0.0%      | 0.0%    | 0.1%    | 0.0%                       | 0.1%     | 0.0%   | 0.4%            | 0.0%             | 0.1%                  | 0.0%                  | 0.0%        | 0.1%               | 0.0%  | 0.0%           | 0.2%                | 1.1%    |
| TRANSPORTATION             | 0.5%     | 0.0%      | 0.0%    | 0.0%    | 0.0%                       | 0.2%     | 0.0%   | 1.1%            | 0.0%             | 0.1%                  | 0.0%                  | 0.1%        | 0.1%               | 0.1%  | 0.4%           | 0.6%                | 3.6%    |
| TRAVELS AND TOURISM        | 0.2%     | 0.0%      | 0.0%    | 0.0%    | 0.0%                       | 0.2%     | 0.0%   | 1.2%            | 0.0%             | 1.2%                  | 0.0%                  | 1.3%        | 0.8%               | 0.1%  | 0.8%           | 0.8%                | 8.6%    |
| UNKNOWN                    | 3.2%     | 0.1%      | 0.3%    | 0.5%    | 1.1%                       | 1.9%     | 0.1%   | 15.0%           | 0.1%             | 1.7%                  | 0.0%                  | 1.3%        | 0.8%               | 0.5%  | 1.2%           | 9.7%                | 37.6%   |
| TOTAL                      | 10.0%    | 0.6%      | 0.8%    | 1.9%    | 1.8%                       | 5.8%     | 0.1%   | 38.0%           | 0.5%             | 5.7%                  | 0.0%                  | 3.4%        | 1.8%               | 3.7%  | 24.7%          | 100.0%              |         |

Figure D6: SCC - SCC: distribution of wire transfers, by sender's and receiver's NACE (total number).

| SENDER                     | RECEIVER |           |         |         |                            |          |        |                 |                  |                       |                       |             |                    | TOTAL |                |                     |         |
|----------------------------|----------|-----------|---------|---------|----------------------------|----------|--------|-----------------|------------------|-----------------------|-----------------------|-------------|--------------------|-------|----------------|---------------------|---------|
|                            | COMMERCE | EDUCATION | FARMING | FINANCE | HEALTH AND SOCIAL SERVICES | INDUSTRY | MINING | NATURAL PERSONS | OTHER ACTIVITIES | PROFESSIONAL SERVICES | PUBLIC ADMINISTRATION | REAL ESTATE | SERVICES PROVIDERS |       | TRANSPORTATION | TRAVELS AND TOURISM | UNKNOWN |
| COMMERCE                   | 3.5%     | 0.0%      | 0.1%    | 0.5%    | 0.0%                       | 1.2%     | 0.0%   | 0.4%            | 0.0%             | 0.4%                  | 0.0%                  | 0.2%        | 0.0%               | 0.2%  | 0.1%           | 2.9%                | 9.5%    |
| EDUCATION                  | 0.0%     | 0.0%      | 0.0%    | 0.0%    | 0.0%                       | 0.0%     | 0.0%   | 0.0%            | 0.0%             | 0.0%                  | 0.0%                  | 0.0%        | 0.0%               | 0.0%  | 0.0%           | 0.0%                | 0.1%    |
| FARMING                    | 0.0%     | 0.0%      | 0.1%    | 0.0%    | 0.0%                       | 0.0%     | 0.0%   | 0.1%            | 0.0%             | 0.0%                  | 0.0%                  | 0.0%        | 0.0%               | 0.0%  | 0.0%           | 0.0%                | 0.3%    |
| FINANCE                    | 0.0%     | 0.0%      | 0.0%    | 0.6%    | 0.0%                       | 0.2%     | 0.0%   | 1.9%            | 0.0%             | 0.4%                  | 0.0%                  | 0.1%        | 0.0%               | 0.0%  | 0.0%           | 0.1%                | 4.3%    |
| HEALTH AND SOCIAL SERVICES | 0.0%     | 0.0%      | 0.0%    | 0.0%    | 0.1%                       | 0.0%     | 0.0%   | 0.1%            | 0.0%             | 0.0%                  | 0.0%                  | 0.0%        | 0.0%               | 0.0%  | 0.0%           | 0.1%                | 0.4%    |
| INDUSTRY                   | 0.5%     | 0.0%      | 0.1%    | 0.2%    | 0.0%                       | 3.0%     | 0.0%   | 0.6%            | 0.0%             | 0.5%                  | 0.0%                  | 0.2%        | 0.2%               | 0.2%  | 0.1%           | 3.7%                | 9.5%    |
| MINING                     | 0.1%     | 0.0%      | 0.0%    | 0.0%    | 0.0%                       | 0.1%     | 0.0%   | 0.0%            | 0.0%             | 0.0%                  | 0.0%                  | 0.0%        | 0.0%               | 0.0%  | 0.0%           | 0.5%                | 0.7%    |
| NATURAL PERSONS            | 0.2%     | 0.0%      | 0.0%    | 0.1%    | 0.0%                       | 0.1%     | 0.0%   | 0.9%            | 0.0%             | 0.4%                  | 0.0%                  | 0.2%        | 0.0%               | 0.0%  | 0.0%           | 0.5%                | 2.1%    |
| OTHER ACTIVITIES           | 0.0%     | 0.0%      | 0.0%    | 0.0%    | 0.0%                       | 0.0%     | 0.0%   | 0.0%            | 0.4%             | 0.1%                  | 0.0%                  | 0.0%        | 0.0%               | 0.0%  | 0.0%           | 0.3%                | 0.7%    |
| PROFESSIONAL SERVICES      | 0.4%     | 0.0%      | 0.0%    | 0.0%    | 0.0%                       | 0.3%     | 0.0%   | 0.6%            | 0.0%             | 12.6%                 | 0.0%                  | 0.5%        | 0.1%               | 0.3%  | 0.0%           | 9.0%                | 24.6%   |
| PUBLIC ADMINISTRATION      | 0.0%     | 0.0%      | 0.0%    | 0.0%    | 0.0%                       | 0.0%     | 0.0%   | 0.0%            | 0.0%             | 0.0%                  | 0.0%                  | 0.0%        | 0.0%               | 0.0%  | 0.0%           | 0.0%                | 0.0%    |
| REAL ESTATE                | 0.1%     | 0.0%      | 0.0%    | 0.0%    | 0.0%                       | 0.1%     | 0.0%   | 0.2%            | 0.0%             | 0.1%                  | 0.0%                  | 0.6%        | 0.0%               | 0.0%  | 0.0%           | 0.3%                | 1.9%    |
| SERVICES PROVIDERS         | 0.1%     | 0.0%      | 0.0%    | 0.0%    | 0.0%                       | 0.1%     | 0.0%   | 0.0%            | 0.0%             | 0.3%                  | 0.0%                  | 0.0%        | 0.7%               | 0.1%  | 0.2%           | 0.6%                | 2.0%    |
| TRANSPORTATION             | 0.1%     | 0.0%      | 0.0%    | 0.0%    | 0.0%                       | 0.1%     | 0.0%   | 0.2%            | 0.0%             | 0.1%                  | 0.0%                  | 0.1%        | 0.0%               | 0.0%  | 0.0%           | 0.9%                | 1.1%    |
| TRAVELS AND TOURISM        | 3.4%     | 0.0%      | 0.3%    | 1.4%    | 0.0%                       | 3.1%     | 0.1%   | 1.9%            | 0.0%             | 3.0%                  | 0.0%                  | 0.8%        | 0.9%               | 1.0%  | 0.4%           | 2.5%                | 18.8%   |
| UNKNOWN                    | 0.1%     | 0.0%      | 0.0%    | 0.0%    | 0.0%                       | 0.0%     | 0.0%   | 0.0%            | 0.0%             | 0.0%                  | 0.0%                  | 0.0%        | 0.0%               | 0.0%  | 0.0%           | 0.0%                | 0.0%    |
| TOTAL                      | 8.5%     | 0.1%      | 0.7%    | 3.4%    | 0.9%                       | 8.2%     | 0.2%   | 7.1%            | 0.6%             | 17.7%                 | 0.0%                  | 2.7%        | 2.1%               | 2.7%  | 1.7%           | 43.3%               | 100.0%  |

Figure D7: SCC - SCC: distribution of wire transfers, by sender's and receiver's NACE (total amount).

| SENDER                     | RECEIVER |           |         |         |                            |          |        |                 |                  |                       |                       |             |                    | TOTAL |                |                     |         |
|----------------------------|----------|-----------|---------|---------|----------------------------|----------|--------|-----------------|------------------|-----------------------|-----------------------|-------------|--------------------|-------|----------------|---------------------|---------|
|                            | COMMERCE | EDUCATION | FARMING | FINANCE | HEALTH AND SOCIAL SERVICES | INDUSTRY | MINING | NATURAL PERSONS | OTHER ACTIVITIES | PROFESSIONAL SERVICES | PUBLIC ADMINISTRATION | REAL ESTATE | SERVICES PROVIDERS |       | TRANSPORTATION | TRAVELS AND TOURISM | UNKNOWN |
| COMMERCE                   | 0.4%     | 0.0%      | 0.0%    | 0.0%    | 0.0%                       | 0.1%     | 0.1%   | 2.4%            | 0.0%             | 0.1%                  | 0.0%                  | 0.1%        | 0.0%               | 0.0%  | 0.1%           | 0.3%                | 3.6%    |
| EDUCATION                  | 0.0%     | 0.0%      | 0.0%    | 0.0%    | 0.0%                       | 0.0%     | 0.0%   | 0.1%            | 0.0%             | 0.0%                  | 0.0%                  | 0.0%        | 0.0%               | 0.0%  | 0.0%           | 0.0%                | 0.2%    |
| FARMING                    | 0.0%     | 0.0%      | 0.1%    | 0.0%    | 0.0%                       | 0.0%     | 0.0%   | 0.5%            | 0.0%             | 0.0%                  | 0.0%                  | 0.0%        | 0.0%               | 0.0%  | 0.0%           | 0.0%                | 0.8%    |
| FINANCE                    | 0.0%     | 0.0%      | 0.0%    | 0.1%    | 0.0%                       | 0.0%     | 0.0%   | 0.4%            | 0.0%             | 0.0%                  | 0.0%                  | 0.0%        | 0.0%               | 0.0%  | 0.0%           | 0.1%                | 0.7%    |
| HEALTH AND SOCIAL SERVICES | 0.0%     | 0.0%      | 0.0%    | 0.0%    | 0.1%                       | 0.0%     | 0.0%   | 0.5%            | 0.0%             | 0.0%                  | 0.0%                  | 0.0%        | 0.0%               | 0.0%  | 0.0%           | 0.1%                | 0.7%    |
| INDUSTRY                   | 0.0%     | 0.0%      | 0.0%    | 0.0%    | 0.0%                       | 0.2%     | 0.0%   | 1.5%            | 0.0%             | 0.0%                  | 0.0%                  | 0.0%        | 0.0%               | 0.2%  | 0.0%           | 0.2%                | 2.2%    |
| MINING                     | 0.0%     | 0.0%      | 0.0%    | 0.0%    | 0.0%                       | 0.0%     | 0.0%   | 56.1%           | 0.0%             | 0.0%                  | 0.0%                  | 0.0%        | 0.0%               | 0.0%  | 0.0%           | 0.0%                | 0.0%    |
| NATURAL PERSONS            | 1.0%     | 0.1%      | 0.2%    | 0.4%    | 0.4%                       | 0.4%     | 0.0%   | 0.2%            | 0.1%             | 1.1%                  | 0.0%                  | 0.0%        | 0.0%               | 0.2%  | 0.6%           | 8.6%                | 70.5%   |
| OTHER ACTIVITIES           | 0.0%     | 0.0%      | 0.0%    | 0.0%    | 0.0%                       | 0.0%     | 0.0%   | 1.7%            | 0.0%             | 0.0%                  | 0.0%                  | 0.0%        | 0.0%               | 0.0%  | 0.0%           | 0.0%                | 0.2%    |
| PROFESSIONAL SERVICES      | 0.0%     | 0.0%      | 0.0%    | 0.0%    | 0.0%                       | 0.0%     | 0.0%   | 0.0%            | 0.3%             | 0.0%                  | 0.0%                  | 0.0%        | 0.0%               | 0.0%  | 0.0%           | 0.3%                | 2.5%    |
| PUBLIC ADMINISTRATION      | 0.0%     | 0.0%      | 0.0%    | 0.0%    | 0.0%                       | 0.0%     | 0.0%   | 0.0%            | 0.0%             | 0.0%                  | 0.0%                  | 0.0%        | 0.0%               | 0.0%  | 0.0%           | 0.0%                | 0.0%    |
| REAL ESTATE                | 0.0%     | 0.0%      | 0.0%    | 0.0%    | 0.0%                       | 0.0%     | 0.0%   | 2.2%            | 0.0%             | 0.1%                  | 0.0%                  | 0.4%        | 0.0%               | 0.0%  | 0.0%           | 0.3%                | 3.0%    |
| SERVICES PROVIDERS         | 0.0%     | 0.0%      | 0.0%    | 0.0%    | 0.0%                       | 0.0%     | 0.0%   | 0.0%            | 0.0%             | 0.0%                  | 0.0%                  | 0.0%        | 0.0%               | 0.0%  | 0.0%           | 0.0%                | 0.1%    |
| TRANSPORTATION             | 0.0%     | 0.0%      | 0.0%    | 0.0%    | 0.0%                       | 0.0%     | 0.0%   | 0.0%            | 0.0%             | 0.0%                  | 0.0%                  | 0.0%        | 0.0%               | 0.0%  | 0.0%           | 0.0%                | 0.1%    |
| TRAVELS AND TOURISM        | 0.3%     | 0.0%      | 0.1%    | 0.2%    | 0.1%                       | 0.1%     | 0.0%   | 5.8%            | 0.0%             | 0.3%                  | 0.0%                  | 0.3%        | 0.0%               | 0.0%  | 0.2%           | 5.8%                | 13.2%   |
| UNKNOWN                    | 1.9%     | 0.2%      | 0.3%    | 0.6%    | 0.5%                       | 0.9%     | 0.1%   | 73.1%           | 0.2%             | 2.1%                  | 0.0%                  | 2.0%        | 0.1%               | 0.6%  | 1.1%           | 15.9%               | 100.0%  |

Figure D8: **OUT - OUT**: distribution of wire transfers, by sender's and receiver's NACE (total number).

| SENDER                     | RECEIVER |           |         |         |                            |          |        |                 |                  |                       |                       | TOTAL |             |                    |                |                     |         |
|----------------------------|----------|-----------|---------|---------|----------------------------|----------|--------|-----------------|------------------|-----------------------|-----------------------|-------|-------------|--------------------|----------------|---------------------|---------|
|                            | COMMERCE | EDUCATION | FARMING | FINANCE | HEALTH AND SOCIAL SERVICES | INDUSTRY | MINING | NATURAL PERSONS | OTHER ACTIVITIES | PROFESSIONAL SERVICES | PUBLIC ADMINISTRATION |       | REAL ESTATE | SERVICES PROVIDERS | TRANSPORTATION | TRAVELS AND TOURISM | UNKNOWN |
| COMMERCE                   | 0.4%     | 0.0%      | 0.0%    | 0.0%    | 0.0%                       | 0.0%     | 0.1%   | 0.5%            | 0.0%             | 0.0%                  | 0.0%                  | 0.0%  | 0.0%        | 0.0%               | 0.0%           | 0.3%                | 1.4%    |
| EDUCATION                  | 0.0%     | 0.0%      | 0.0%    | 0.0%    | 0.0%                       | 0.0%     | 0.0%   | 0.0%            | 0.0%             | 0.0%                  | 0.0%                  | 0.0%  | 0.0%        | 0.0%               | 0.0%           | 0.0%                | 0.1%    |
| FARMING                    | 0.0%     | 0.0%      | 0.2%    | 0.0%    | 0.0%                       | 0.0%     | 0.0%   | 0.2%            | 0.0%             | 0.0%                  | 0.0%                  | 0.0%  | 0.0%        | 0.0%               | 0.0%           | 0.1%                | 0.6%    |
| FINANCE                    | 0.0%     | 0.0%      | 0.0%    | 0.6%    | 0.0%                       | 0.0%     | 0.0%   | 0.1%            | 0.0%             | 0.0%                  | 0.0%                  | 0.0%  | 0.0%        | 0.0%               | 0.0%           | 3.5%                | 4.4%    |
| HEALTH AND SOCIAL SERVICES | 0.0%     | 0.0%      | 0.0%    | 0.0%    | 0.1%                       | 0.0%     | 0.0%   | 0.1%            | 0.0%             | 0.0%                  | 0.0%                  | 0.0%  | 0.0%        | 0.0%               | 0.0%           | 0.0%                | 0.3%    |
| INDUSTRY                   | 0.0%     | 0.0%      | 0.0%    | 0.6%    | 0.0%                       | 0.5%     | 0.0%   | 0.4%            | 0.0%             | 0.0%                  | 0.0%                  | 0.1%  | 0.0%        | 0.2%               | 0.0%           | 0.7%                | 2.5%    |
| MINING                     | 0.0%     | 0.0%      | 0.0%    | 0.0%    | 0.0%                       | 0.0%     | 0.0%   | 0.0%            | 0.0%             | 0.0%                  | 0.0%                  | 0.0%  | 0.0%        | 0.0%               | 0.0%           | 0.0%                | 0.0%    |
| NATURAL PERSONS            | 0.3%     | 0.0%      | 0.0%    | 0.1%    | 0.1%                       | 0.2%     | 0.0%   | 13.1%           | 0.0%             | 0.2%                  | 0.0%                  | 0.5%  | 0.0%        | 0.0%               | 0.1%           | 2.4%                | 17.3%   |
| OTHER ACTIVITIES           | 0.0%     | 0.0%      | 0.0%    | 0.0%    | 0.0%                       | 0.0%     | 0.0%   | 0.0%            | 0.0%             | 0.0%                  | 0.0%                  | 0.0%  | 0.0%        | 0.0%               | 0.0%           | 0.0%                | 0.1%    |
| PROFESSIONAL SERVICES      | 0.0%     | 0.0%      | 0.0%    | 0.0%    | 0.0%                       | 0.0%     | 0.0%   | 0.4%            | 0.0%             | 0.5%                  | 0.0%                  | 0.0%  | 0.0%        | 0.0%               | 0.0%           | 1.1%                | 2.2%    |
| PUBLIC ADMINISTRATION      | 0.0%     | 0.0%      | 0.0%    | 0.0%    | 0.0%                       | 0.0%     | 0.0%   | 0.0%            | 0.0%             | 0.0%                  | 0.0%                  | 0.0%  | 0.0%        | 0.0%               | 0.0%           | 0.0%                | 0.0%    |
| REAL ESTATE                | 0.0%     | 0.0%      | 0.0%    | 0.0%    | 0.0%                       | 0.0%     | 0.0%   | 0.6%            | 0.0%             | 0.1%                  | 0.0%                  | 0.9%  | 0.0%        | 0.0%               | 0.0%           | 0.6%                | 2.1%    |
| SERVICES PROVIDERS         | 0.0%     | 0.0%      | 0.0%    | 0.3%    | 0.0%                       | 0.0%     | 0.0%   | 0.0%            | 0.0%             | 0.0%                  | 0.0%                  | 0.1%  | 0.0%        | 0.0%               | 0.0%           | 0.1%                | 0.7%    |
| TRANSPORTATION             | 0.0%     | 0.0%      | 0.0%    | 0.0%    | 0.0%                       | 0.0%     | 0.0%   | 0.1%            | 0.0%             | 0.0%                  | 0.0%                  | 0.0%  | 0.0%        | 0.2%               | 0.0%           | 0.1%                | 0.4%    |
| TRAVELS AND TOURISM        | 0.0%     | 0.0%      | 0.0%    | 0.0%    | 0.0%                       | 0.0%     | 0.0%   | 0.2%            | 0.0%             | 0.0%                  | 0.0%                  | 0.0%  | 0.0%        | 0.0%               | 0.0%           | 0.0%                | 0.4%    |
| UNKNOWN                    | 0.6%     | 0.0%      | 0.1%    | 6.4%    | 0.0%                       | 0.3%     | 0.1%   | 1.9%            | 0.0%             | 0.2%                  | 0.0%                  | 0.3%  | 0.0%        | 0.1%               | 0.0%           | 57.1%               | 64.1%   |
| TOTAL                      | 1.4%     | 0.1%      | 0.4%    | 8.2%    | 0.2%                       | 1.1%     | 0.2%   | 17.7%           | 0.1%             | 1.2%                  | 0.0%                  | 1.8%  | 0.1%        | 0.5%               | 0.9%           | 64.1%               | 100.0%  |

Figure D9: **OUT - OUT**: distribution of wire transfers, by sender's and receiver's NACE (total amount).



| SENDER                     | RECEIVER |           |         |         |                            |          |        |                 |                  |                       |                       |             |                    | TOTAL |                |                     |         |
|----------------------------|----------|-----------|---------|---------|----------------------------|----------|--------|-----------------|------------------|-----------------------|-----------------------|-------------|--------------------|-------|----------------|---------------------|---------|
|                            | COMMERCE | EDUCATION | FARMING | FINANCE | HEALTH AND SOCIAL SERVICES | INDUSTRY | MINING | NATURAL PERSONS | OTHER ACTIVITIES | PROFESSIONAL SERVICES | PUBLIC ADMINISTRATION | REAL ESTATE | SERVICES PROVIDERS |       | TRANSPORTATION | TRAVELS AND TOURISM | UNKNOWN |
| COMMERCE                   | 1.7%     | 0.0%      | 0.1%    | 0.1%    | 0.0%                       | 0.8%     | 0.0%   | 0.7%            | 0.0%             | 0.5%                  | 0.0%                  | 0.1%        | 0.2%               | 0.2%  | 0.3%           | 1.9%                | 6.5%    |
| EDUCATION                  | 0.0%     | 0.0%      | 0.0%    | 0.0%    | 0.0%                       | 0.0%     | 0.0%   | 0.1%            | 0.0%             | 0.0%                  | 0.0%                  | 0.0%        | 0.0%               | 0.0%  | 0.0%           | 0.1%                | 0.2%    |
| FARMING                    | 0.1%     | 0.0%      | 0.1%    | 0.0%    | 0.0%                       | 0.1%     | 0.0%   | 0.1%            | 0.0%             | 0.1%                  | 0.0%                  | 0.0%        | 0.0%               | 0.0%  | 0.0%           | 0.2%                | 0.8%    |
| FINANCE                    | 0.1%     | 0.0%      | 0.0%    | 0.1%    | 0.0%                       | 0.0%     | 0.0%   | 1.4%            | 0.0%             | 0.1%                  | 0.0%                  | 0.1%        | 0.0%               | 0.0%  | 0.1%           | 0.6%                | 2.5%    |
| HEALTH AND SOCIAL SERVICES | 0.2%     | 0.0%      | 0.0%    | 0.0%    | 0.1%                       | 0.1%     | 0.0%   | 0.3%            | 0.0%             | 0.1%                  | 0.0%                  | 0.0%        | 0.0%               | 0.0%  | 0.1%           | 0.4%                | 1.3%    |
| INDUSTRY                   | 0.4%     | 0.0%      | 0.0%    | 0.0%    | 0.0%                       | 0.2%     | 0.0%   | 0.4%            | 0.0%             | 0.2%                  | 0.0%                  | 0.1%        | 0.1%               | 0.1%  | 0.1%           | 0.8%                | 2.8%    |
| MINING                     | 0.0%     | 0.0%      | 0.0%    | 0.0%    | 0.0%                       | 0.0%     | 0.0%   | 0.0%            | 0.0%             | 0.0%                  | 0.0%                  | 0.0%        | 0.0%               | 0.0%  | 0.0%           | 0.0%                | 0.0%    |
| NATURAL PERSONS            | 3.0%     | 1.1%      | 0.2%    | 1.3%    | 1.9%                       | 1.0%     | 0.0%   | 11.8%           | 0.4%             | 3.4%                  | 0.0%                  | 2.2%        | 1.3%               | 0.2%  | 2.7%           | 25.0%               | 55.6%   |
| OTHER ACTIVITIES           | 0.0%     | 0.0%      | 0.0%    | 0.0%    | 0.0%                       | 0.0%     | 0.0%   | 0.1%            | 0.0%             | 0.1%                  | 0.0%                  | 0.0%        | 0.0%               | 0.0%  | 0.0%           | 0.4%                | 0.4%    |
| PROFESSIONAL SERVICES      | 0.4%     | 0.0%      | 0.0%    | 0.1%    | 0.0%                       | 0.2%     | 0.0%   | 1.0%            | 0.0%             | 0.5%                  | 0.0%                  | 0.1%        | 0.1%               | 0.0%  | 0.1%           | 1.1%                | 3.7%    |
| PUBLIC ADMINISTRATION      | 0.0%     | 0.0%      | 0.0%    | 0.0%    | 0.0%                       | 0.0%     | 0.0%   | 0.0%            | 0.0%             | 0.0%                  | 0.0%                  | 0.0%        | 0.0%               | 0.0%  | 0.0%           | 0.0%                | 0.0%    |
| REAL ESTATE                | 0.2%     | 0.0%      | 0.0%    | 0.1%    | 0.0%                       | 0.1%     | 0.0%   | 0.3%            | 0.0%             | 0.3%                  | 0.0%                  | 0.2%        | 0.1%               | 0.0%  | 0.1%           | 0.7%                | 2.1%    |
| SERVICES PROVIDERS         | 0.0%     | 0.0%      | 0.0%    | 0.0%    | 0.0%                       | 0.0%     | 0.0%   | 0.0%            | 0.0%             | 0.0%                  | 0.0%                  | 0.0%        | 0.0%               | 0.0%  | 0.0%           | 0.0%                | 0.2%    |
| TRANSPORTATION             | 0.5%     | 0.0%      | 0.0%    | 0.0%    | 0.0%                       | 0.0%     | 0.0%   | 0.1%            | 0.0%             | 0.0%                  | 0.0%                  | 0.0%        | 0.0%               | 0.0%  | 0.0%           | 0.7%                | 1.6%    |
| TRAVELS AND TOURISM        | 2.0%     | 0.2%      | 0.1%    | 0.5%    | 0.4%                       | 1.0%     | 0.1%   | 3.4%            | 0.1%             | 1.5%                  | 0.0%                  | 1.2%        | 0.8%               | 0.3%  | 0.5%           | 8.0%                | 21.4%   |
| UNKNOWN                    | 0.0%     | 0.0%      | 0.0%    | 0.0%    | 0.0%                       | 0.0%     | 0.0%   | 0.0%            | 0.0%             | 0.0%                  | 0.0%                  | 0.0%        | 0.0%               | 0.0%  | 0.0%           | 0.0%                | 0.0%    |
| TOTAL                      | 6.7%     | 1.4%      | 0.5%    | 2.3%    | 2.5%                       | 4.1%     | 0.1%   | 20.2%           | 0.6%             | 7.2%                  | 0.0%                  | 4.2%        | 2.9%               | 1.0%  | 4.6%           | 39.7%               | 100.0%  |

Figure D10: IN - SCC: distribution of wire transfers, by sender's and receiver's NACE (total number).

| SENDER                     | RECEIVER |           |         |         |                            |          |        |                 |                  |                       |                       |             |                    | TOTAL |                |                     |         |
|----------------------------|----------|-----------|---------|---------|----------------------------|----------|--------|-----------------|------------------|-----------------------|-----------------------|-------------|--------------------|-------|----------------|---------------------|---------|
|                            | COMMERCE | EDUCATION | FARMING | FINANCE | HEALTH AND SOCIAL SERVICES | INDUSTRY | MINING | NATURAL PERSONS | OTHER ACTIVITIES | PROFESSIONAL SERVICES | PUBLIC ADMINISTRATION | REAL ESTATE | SERVICES PROVIDERS |       | TRANSPORTATION | TRAVELS AND TOURISM | UNKNOWN |
| COMMERCE                   | 6.1%     | 0.0%      | 0.1%    | 0.0%    | 0.0%                       | 0.7%     | 0.0%   | 0.3%            | 0.0%             | 0.2%                  | 0.0%                  | 0.1%        | 0.0%               | 0.2%  | 0.1%           | 3.2%                | 11.1%   |
| EDUCATION                  | 0.0%     | 0.1%      | 0.0%    | 0.0%    | 0.0%                       | 0.0%     | 0.0%   | 0.0%            | 0.0%             | 0.0%                  | 0.0%                  | 0.0%        | 0.0%               | 0.0%  | 0.0%           | 0.0%                | 0.2%    |
| FARMING                    | 0.1%     | 0.0%      | 0.2%    | 0.0%    | 0.0%                       | 0.0%     | 0.0%   | 0.1%            | 0.0%             | 0.0%                  | 0.0%                  | 0.0%        | 0.0%               | 0.0%  | 0.0%           | 0.1%                | 0.6%    |
| FINANCE                    | 0.0%     | 0.0%      | 0.0%    | 0.4%    | 0.0%                       | 0.1%     | 0.0%   | 1.1%            | 0.0%             | 0.7%                  | 0.0%                  | 0.0%        | 0.0%               | 0.0%  | 0.0%           | 2.4%                | 4.9%    |
| HEALTH AND SOCIAL SERVICES | 0.0%     | 0.0%      | 0.0%    | 0.0%    | 0.2%                       | 0.0%     | 0.0%   | 0.1%            | 0.0%             | 0.0%                  | 0.0%                  | 0.0%        | 0.0%               | 0.0%  | 0.0%           | 0.2%                | 0.6%    |
| INDUSTRY                   | 0.3%     | 0.0%      | 0.0%    | 0.0%    | 0.0%                       | 1.8%     | 0.0%   | 0.2%            | 0.0%             | 0.2%                  | 0.0%                  | 0.1%        | 0.1%               | 0.1%  | 0.1%           | 1.2%                | 4.0%    |
| MINING                     | 0.0%     | 0.0%      | 0.0%    | 0.0%    | 0.0%                       | 0.0%     | 0.0%   | 0.0%            | 0.0%             | 0.0%                  | 0.0%                  | 0.0%        | 0.0%               | 0.0%  | 0.0%           | 0.0%                | 0.0%    |
| NATURAL PERSONS            | 1.2%     | 0.2%      | 0.1%    | 0.5%    | 0.5%                       | 0.4%     | 0.0%   | 5.5%            | 0.1%             | 0.6%                  | 0.0%                  | 1.6%        | 0.0%               | 0.0%  | 0.4%           | 5.2%                | 16.5%   |
| OTHER ACTIVITIES           | 0.0%     | 0.0%      | 0.0%    | 0.0%    | 0.0%                       | 0.0%     | 0.0%   | 0.0%            | 0.1%             | 0.1%                  | 0.0%                  | 0.0%        | 0.0%               | 0.0%  | 0.0%           | 0.0%                | 0.5%    |
| PROFESSIONAL SERVICES      | 0.2%     | 0.0%      | 0.0%    | 0.0%    | 0.1%                       | 0.1%     | 0.0%   | 0.6%            | 0.0%             | 0.7%                  | 0.0%                  | 0.1%        | 0.0%               | 0.0%  | 0.1%           | 1.0%                | 3.4%    |
| PUBLIC ADMINISTRATION      | 0.0%     | 0.0%      | 0.0%    | 0.0%    | 0.0%                       | 0.0%     | 0.0%   | 0.0%            | 0.0%             | 0.0%                  | 0.0%                  | 0.0%        | 0.0%               | 0.0%  | 0.0%           | 0.0%                | 0.0%    |
| REAL ESTATE                | 0.2%     | 0.0%      | 0.0%    | 0.1%    | 0.0%                       | 0.2%     | 0.0%   | 0.3%            | 0.0%             | 0.1%                  | 0.0%                  | 0.5%        | 0.0%               | 0.0%  | 0.1%           | 0.6%                | 2.4%    |
| SERVICES PROVIDERS         | 0.0%     | 0.0%      | 0.0%    | 0.0%    | 0.0%                       | 0.1%     | 0.0%   | 0.0%            | 0.0%             | 0.1%                  | 0.0%                  | 0.0%        | 0.1%               | 0.0%  | 0.0%           | 0.4%                | 0.5%    |
| TRANSPORTATION             | 0.0%     | 0.0%      | 0.0%    | 0.0%    | 0.0%                       | 0.1%     | 0.0%   | 0.0%            | 0.0%             | 0.0%                  | 0.0%                  | 0.0%        | 0.0%               | 0.0%  | 0.0%           | 0.0%                | 0.0%    |
| TRAVELS AND TOURISM        | 0.2%     | 0.0%      | 0.0%    | 0.0%    | 0.0%                       | 0.1%     | 0.0%   | 0.1%            | 0.0%             | 0.1%                  | 0.0%                  | 0.1%        | 0.0%               | 0.0%  | 0.3%           | 0.3%                | 1.4%    |
| UNKNOWN                    | 6.2%     | 0.2%      | 0.2%    | 2.5%    | 0.3%                       | 2.3%     | 0.1%   | 2.4%            | 0.1%             | 3.5%                  | 0.0%                  | 1.5%        | 0.6%               | 1.0%  | 0.4%           | 31.2%               | 52.6%   |
| TOTAL                      | 14.6%    | 0.5%      | 0.6%    | 4.1%    | 1.1%                       | 5.8%     | 0.1%   | 10.9%           | 0.3%             | 6.3%                  | 0.0%                  | 4.5%        | 1.1%               | 2.2%  | 1.6%           | 46.1%               | 100.0%  |

Figure D11: IN - SCC: distribution of wire transfers, by sender's and receiver's NACE (total amount).

| SENDER                     | RECEIVER |           |         |         |                            |          |        |                 |                  |                       |                       | TOTAL |             |                    |                |                     |         |
|----------------------------|----------|-----------|---------|---------|----------------------------|----------|--------|-----------------|------------------|-----------------------|-----------------------|-------|-------------|--------------------|----------------|---------------------|---------|
|                            | COMMERCE | EDUCATION | FARMING | FINANCE | HEALTH AND SOCIAL SERVICES | INDUSTRY | MINING | NATURAL PERSONS | OTHER ACTIVITIES | PROFESSIONAL SERVICES | PUBLIC ADMINISTRATION |       | REAL ESTATE | SERVICES PROVIDERS | TRANSPORTATION | TRAVELS AND TOURISM | UNKNOWN |
| COMMERCE                   | 0.4%     | 0.0%      | 0.0%    | 0.0%    | 0.0%                       | 0.1%     | 0.0%   | 6.3%            | 0.0%             | 0.1%                  | 0.0%                  | 0.1%  | 0.0%        | 0.0%               | 0.0%           | 0.7%                | 7.5%    |
| EDUCATION                  | 0.0%     | 0.0%      | 0.0%    | 0.0%    | 0.0%                       | 0.0%     | 0.0%   | 0.4%            | 0.0%             | 0.0%                  | 0.0%                  | 0.0%  | 0.0%        | 0.0%               | 0.0%           | 0.0%                | 0.5%    |
| FARMING                    | 0.0%     | 0.0%      | 0.1%    | 0.0%    | 0.0%                       | 0.0%     | 0.0%   | 0.6%            | 0.0%             | 0.0%                  | 0.0%                  | 0.0%  | 0.0%        | 0.0%               | 0.0%           | 0.0%                | 0.7%    |
| FINANCE                    | 0.0%     | 0.0%      | 0.0%    | 0.1%    | 0.0%                       | 0.0%     | 0.0%   | 5.3%            | 0.0%             | 0.1%                  | 0.0%                  | 0.0%  | 0.0%        | 0.0%               | 0.0%           | 0.8%                | 6.5%    |
| HEALTH AND SOCIAL SERVICES | 0.0%     | 0.0%      | 0.0%    | 0.0%    | 0.1%                       | 0.0%     | 0.0%   | 2.8%            | 0.0%             | 0.0%                  | 0.0%                  | 0.0%  | 0.0%        | 0.0%               | 0.0%           | 0.2%                | 3.2%    |
| INDUSTRY                   | 0.2%     | 0.0%      | 0.0%    | 0.0%    | 0.0%                       | 0.3%     | 0.0%   | 8.2%            | 0.0%             | 0.1%                  | 0.0%                  | 0.0%  | 0.0%        | 0.1%               | 0.0%           | 0.7%                | 9.8%    |
| MINING                     | 0.6%     | 0.0%      | 0.0%    | 0.0%    | 0.0%                       | 0.0%     | 0.0%   | 0.5%            | 0.0%             | 0.0%                  | 0.0%                  | 0.0%  | 0.0%        | 0.0%               | 0.0%           | 0.1%                | 1.6%    |
| NATURAL PERSONS            | 0.1%     | 0.0%      | 0.0%    | 0.1%    | 0.0%                       | 0.1%     | 0.0%   | 5.6%            | 0.0%             | 0.2%                  | 0.0%                  | 0.1%  | 0.0%        | 0.0%               | 0.1%           | 1.1%                | 7.5%    |
| OTHER ACTIVITIES           | 0.1%     | 0.0%      | 0.0%    | 0.0%    | 0.0%                       | 0.0%     | 0.0%   | 0.7%            | 0.0%             | 0.0%                  | 0.0%                  | 0.0%  | 0.0%        | 0.0%               | 0.0%           | 0.1%                | 0.9%    |
| PROFESSIONAL SERVICES      | 0.5%     | 0.0%      | 0.0%    | 0.0%    | 0.0%                       | 0.0%     | 0.0%   | 4.3%            | 0.0%             | 0.3%                  | 0.0%                  | 0.1%  | 0.0%        | 0.0%               | 0.0%           | 0.6%                | 6.2%    |
| PUBLIC ADMINISTRATION      | 0.0%     | 0.0%      | 0.0%    | 0.0%    | 0.0%                       | 0.0%     | 0.0%   | 0.0%            | 0.0%             | 0.0%                  | 0.0%                  | 0.0%  | 0.0%        | 0.0%               | 0.0%           | 0.0%                | 0.0%    |
| REAL ESTATE                | 0.1%     | 0.0%      | 0.0%    | 0.0%    | 0.0%                       | 0.0%     | 0.0%   | 2.4%            | 0.0%             | 0.0%                  | 0.0%                  | 0.3%  | 0.0%        | 0.0%               | 0.0%           | 0.2%                | 3.1%    |
| SERVICES PROVIDERS         | 0.1%     | 0.0%      | 0.0%    | 0.0%    | 0.0%                       | 0.0%     | 0.0%   | 1.2%            | 0.0%             | 0.0%                  | 0.0%                  | 0.0%  | 0.0%        | 0.0%               | 0.0%           | 0.1%                | 1.4%    |
| TRANSPORTATION             | 0.1%     | 0.0%      | 0.0%    | 0.0%    | 0.0%                       | 0.0%     | 0.0%   | 3.4%            | 0.0%             | 0.0%                  | 0.0%                  | 0.0%  | 0.0%        | 0.0%               | 0.0%           | 0.3%                | 3.7%    |
| TRAVELS AND TOURISM        | 0.8%     | 0.0%      | 0.3%    | 0.2%    | 0.0%                       | 0.0%     | 0.0%   | 4.6%            | 0.0%             | 0.0%                  | 0.0%                  | 0.0%  | 0.0%        | 0.0%               | 0.0%           | 0.6%                | 6.3%    |
| UNKNOWN                    | 0.9%     | 0.0%      | 0.2%    | 0.2%    | 0.2%                       | 0.0%     | 0.0%   | 30.1%           | 0.0%             | 0.5%                  | 0.0%                  | 0.1%  | 0.0%        | 0.1%               | 0.1%           | 8.2%                | 42.8%   |
| TOTAL                      | 3.2%     | 0.1%      | 0.5%    | 0.5%    | 0.5%                       | 1.1%     | 0.1%   | 76.5%           | 0.1%             | 1.4%                  | 0.0%                  | 1.1%  | 0.1%        | 0.4%               | 1.0%           | 13.5%               | 100.0%  |

Figure D12: SCC - OUT: distribution of wire transfers, by sender's and receiver's NACE (total number).

| SENDER                     | RECEIVER |           |         |         |                            |          |        |                 |                  |                       |                       |             |                    | TOTAL |                |                     |         |
|----------------------------|----------|-----------|---------|---------|----------------------------|----------|--------|-----------------|------------------|-----------------------|-----------------------|-------------|--------------------|-------|----------------|---------------------|---------|
|                            | COMMERCE | EDUCATION | FARMING | FINANCE | HEALTH AND SOCIAL SERVICES | INDUSTRY | MINING | NATURAL PERSONS | OTHER ACTIVITIES | PROFESSIONAL SERVICES | PUBLIC ADMINISTRATION | REAL ESTATE | SERVICES PROVIDERS |       | TRANSPORTATION | TRAVELS AND TOURISM | UNKNOWN |
| COMMERCE                   | 0.6%     | 0.0%      | 0.0%    | 0.1%    | 0.0%                       | 0.5%     | 0.6%   | 0.9%            | 0.0%             | 0.1%                  | 0.0%                  | 0.1%        | 0.0%               | 0.0%  | 0.0%           | 1.2%                | 4.1%    |
| EDUCATION                  | 0.0%     | 0.0%      | 0.0%    | 0.0%    | 0.0%                       | 0.0%     | 0.0%   | 0.0%            | 0.0%             | 0.0%                  | 0.0%                  | 0.0%        | 0.0%               | 0.0%  | 0.0%           | 0.0%                | 0.1%    |
| FARMING                    | 0.0%     | 0.0%      | 0.1%    | 0.0%    | 0.0%                       | 0.0%     | 0.0%   | 0.1%            | 0.0%             | 0.0%                  | 0.0%                  | 0.0%        | 0.0%               | 0.0%  | 0.0%           | 0.0%                | 0.3%    |
| FINANCE                    | 0.1%     | 0.0%      | 0.1%    | 1.0%    | 0.0%                       | 0.1%     | 0.0%   | 6.8%            | 0.0%             | 0.1%                  | 0.0%                  | 0.0%        | 0.0%               | 0.0%  | 0.0%           | 2.0%                | 10.4%   |
| HEALTH AND SOCIAL SERVICES | 0.0%     | 0.0%      | 0.0%    | 0.0%    | 0.0%                       | 0.0%     | 0.0%   | 0.3%            | 0.0%             | 0.0%                  | 0.0%                  | 0.0%        | 0.0%               | 0.0%  | 0.0%           | 0.0%                | 0.4%    |
| INDUSTRY                   | 0.1%     | 0.0%      | 0.0%    | 0.3%    | 0.0%                       | 1.4%     | 0.6%   | 1.5%            | 0.0%             | 0.1%                  | 0.0%                  | 0.1%        | 0.0%               | 0.0%  | 0.0%           | 1.5%                | 5.9%    |
| MINING                     | 0.1%     | 0.0%      | 0.0%    | 0.0%    | 0.0%                       | 0.0%     | 0.0%   | 0.1%            | 0.0%             | 0.0%                  | 0.0%                  | 0.0%        | 0.0%               | 0.0%  | 0.0%           | 0.2%                | 1.3%    |
| NATURAL PERSONS            | 0.0%     | 0.0%      | 0.0%    | 0.0%    | 0.0%                       | 0.0%     | 0.0%   | 0.9%            | 0.0%             | 0.0%                  | 0.0%                  | 0.0%        | 0.0%               | 0.0%  | 0.0%           | 0.0%                | 0.7%    |
| OTHER ACTIVITIES           | 0.0%     | 0.0%      | 0.0%    | 0.0%    | 0.0%                       | 0.0%     | 0.0%   | 0.1%            | 0.8%             | 0.0%                  | 0.0%                  | 0.0%        | 0.0%               | 0.0%  | 0.0%           | 0.0%                | 1.2%    |
| PROFESSIONAL SERVICES      | 0.1%     | 0.0%      | 0.0%    | 0.0%    | 0.0%                       | 0.1%     | 0.0%   | 0.8%            | 0.0%             | 6.0%                  | 0.0%                  | 0.0%        | 0.0%               | 0.0%  | 0.0%           | 2.1%                | 12.1%   |
| PUBLIC ADMINISTRATION      | 0.0%     | 0.0%      | 0.0%    | 0.0%    | 0.0%                       | 0.0%     | 0.0%   | 0.0%            | 0.0%             | 0.0%                  | 0.0%                  | 0.0%        | 0.0%               | 0.0%  | 0.0%           | 0.0%                | 0.0%    |
| REAL ESTATE                | 0.0%     | 0.0%      | 0.0%    | 0.0%    | 0.0%                       | 0.0%     | 0.0%   | 0.4%            | 0.0%             | 0.0%                  | 0.2%                  | 0.0%        | 0.0%               | 0.0%  | 0.0%           | 0.4%                | 1.1%    |
| SERVICES PROVIDERS         | 0.0%     | 0.0%      | 0.0%    | 0.0%    | 0.0%                       | 0.0%     | 0.0%   | 0.1%            | 0.0%             | 0.0%                  | 0.0%                  | 0.0%        | 0.1%               | 0.0%  | 0.0%           | 0.3%                | 0.8%    |
| TRANSPORTATION             | 0.0%     | 0.0%      | 0.0%    | 0.0%    | 0.0%                       | 0.1%     | 0.0%   | 0.7%            | 0.0%             | 0.0%                  | 0.0%                  | 0.0%        | 0.0%               | 0.0%  | 0.0%           | 0.4%                | 1.4%    |
| TRAVELS AND TOURISM        | 2.0%     | 0.0%      | 0.0%    | 1.0%    | 0.0%                       | 5.2%     | 1.4%   | 4.0%            | 1.3%             | 2.5%                  | 0.0%                  | 0.0%        | 0.0%               | 0.0%  | 0.1%           | 3.4%                | 19.9%   |
| UNKNOWN                    | 0.0%     | 0.0%      | 0.0%    | 0.0%    | 0.2%                       | 0.0%     | 0.0%   | 0.0%            | 0.0%             | 0.0%                  | 0.0%                  | 0.0%        | 0.0%               | 0.0%  | 0.0%           | 0.0%                | 0.0%    |
| TOTAL                      | 3.2%     | 0.0%      | 0.4%    | 5.4%    | 0.2%                       | 7.6%     | 2.6%   | 17.3%           | 2.1%             | 8.9%                  | 1.5%                  | 0.0%        | 0.8%               | 0.9%  | 0.8%           | 48.4%               | 100.0%  |

Figure D13: **SCC - OUT**: distribution of wire transfers, by sender's and receiver's NACE (total amount).
