# Supplementary material for: Structural inequalities emerging from a large wire transfers network
Source: Springer Nature journal article supplement (doi:10.1007/s41109-020-00314-x), 2020-10-13
Supplement: 41109_2020_314_MOESM5_ESM.pdf [file 41109_2020_314_MOESM5_ESM.pdf]

## Additional Materials E: Wire transfers total amount between regions

This appendix contains one figure in tabular form showing total amount sent/received between regions grouped by North, Centre, South and Islands. These values have been used to produce some plots in Section “Inequalities and specialisations at a regional basis” of the paper.
