# Supplementary material for: Structural inequalities emerging from a large wire transfers network
Source: Springer Nature journal article supplement (doi:10.1007/s41109-020-00314-x), 2020-10-13
Supplement: 41109_2020_314_MOESM6_ESM.pdf [file 41109_2020_314_MOESM6_ESM.pdf]

## Additional Materials F: Distribution of incomes and expenditures for all the Italian Regions by sectors

This appendix contains three figures showing incomes and expenditures distributions divided by NACE codes for all the Italian regions, completing information provided for only three regions in the paper.

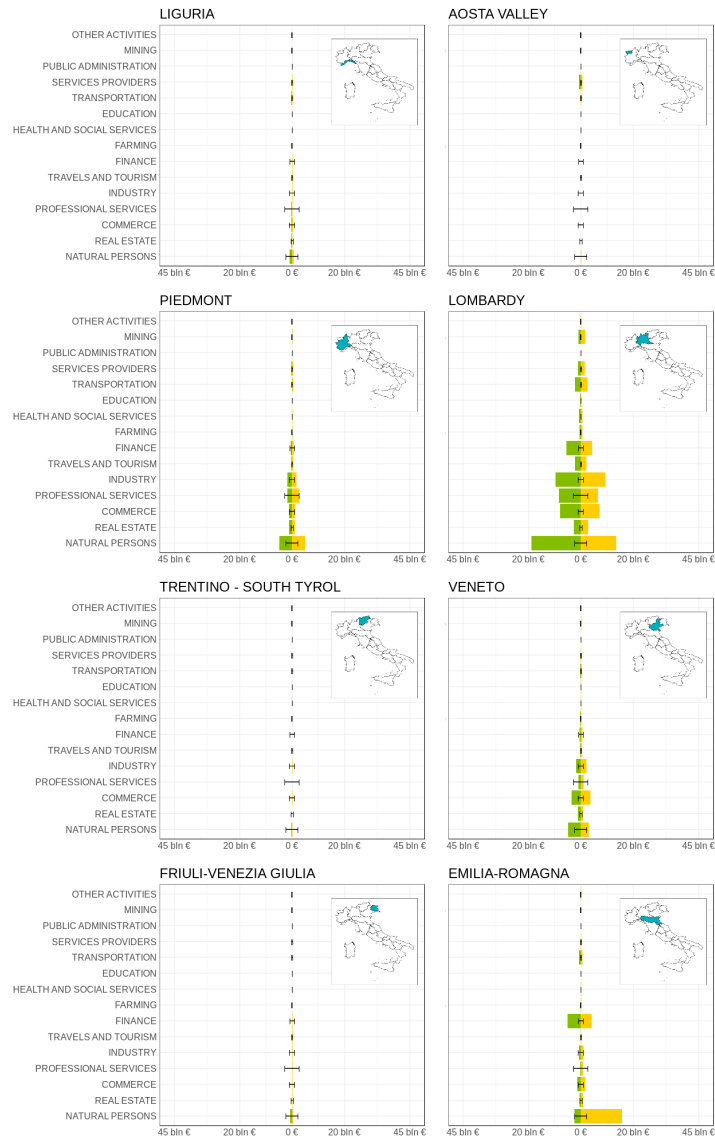

Figure F1: **Distribution of incomes and expenditures by NACE codes for 8 Northern Italian regions:** Money spent/received by any region to/from all the other regions, divided by business sectors and compared to regional averages (black ticks).

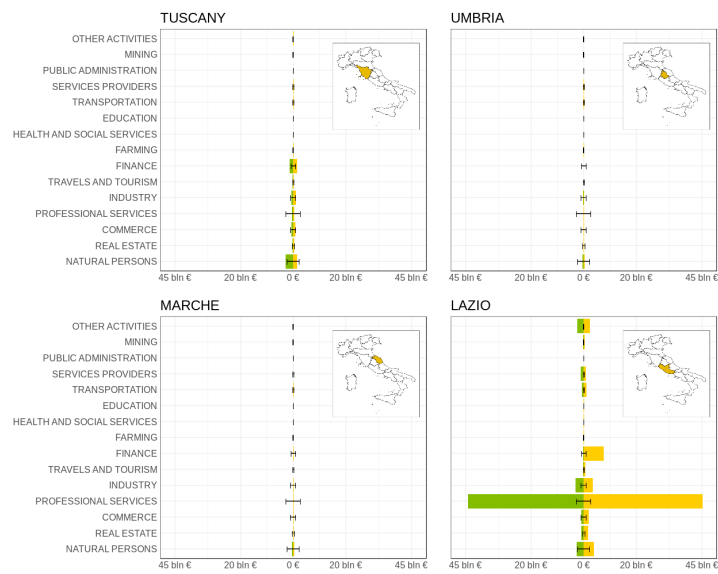

Figure F2: **Distribution of incomes and expenditures by NACE codes for 4 Center Italian regions:** Money spent/received by any region to/from all the other regions, divided by business sectors and compared to regional averages (black ticks).

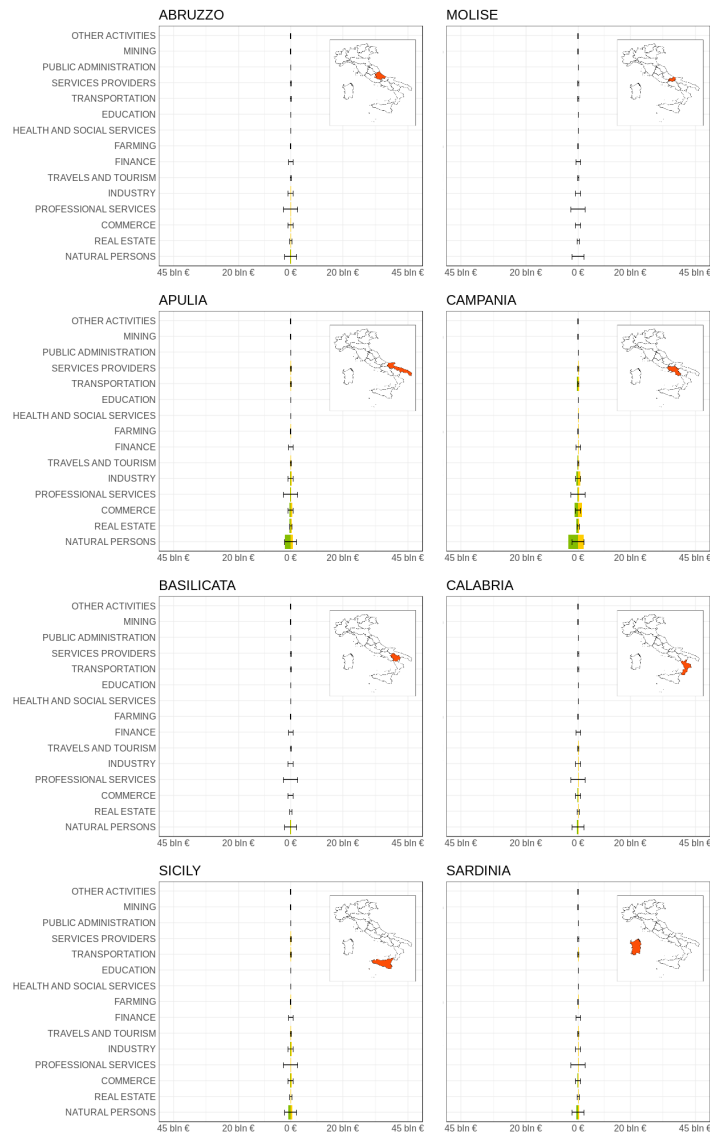

Figure F3: **Distribution of incomes and expenditures by NACE codes for 8 Southern Italian regions:** Money spent/received by any region to/from all the other regions, divided by business sectors and compared to regional averages (black ticks).
